# Supplementary material for: Impact of silencing hepatic SREBP-1 on insulin signaling
Source: PubMed Central journal article supplement (PMC5933792; doi:10.1371/journal.pone.0196704), 2018-05-03
Supplement: pone.0196704.s002.pdf [file pone.0196704.s002.pdf]

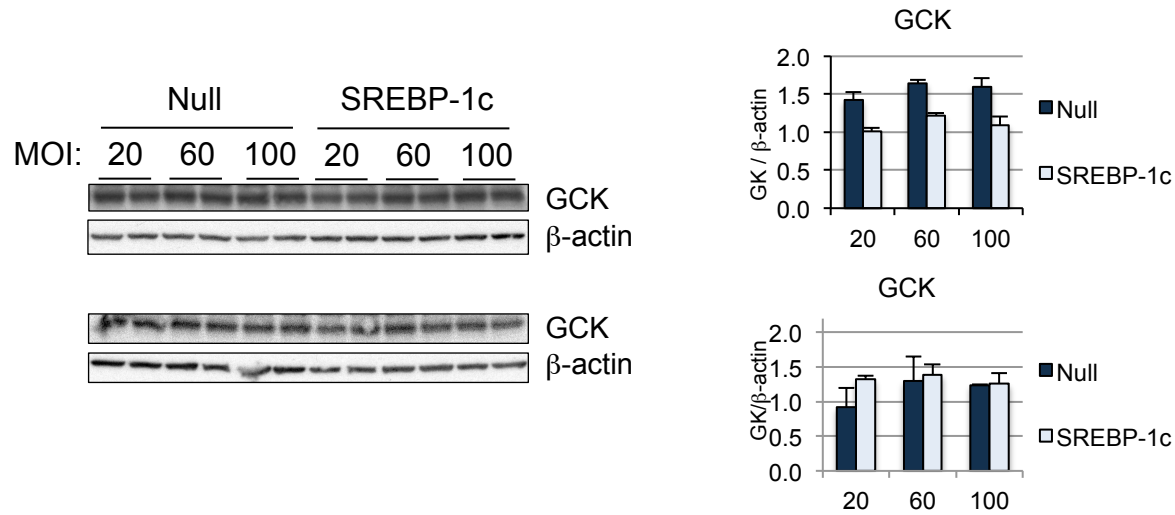

**S2 Fig. Glucokinase is not upregulated in primary hepatocytes overexpressing SREBP-1c.** Primary hepatocytes were cultured as described in Supplementary Fig.1. Cells were transduced with an adenovirus expressing SREBP-1c or a control vector (Null) at the multiplicity of infection (MOI) indicated on the top. Cells were harvested 48 hours later. Two independent experiments are shown. GCK, glucokinase.
